# Supplementary material for: Structural basis of transcription initiation by RNA polymerase II
Source: Springer Nature journal article supplement (doi:10.1038/nrm3952), 2015-02-18
Supplement: 41580_2015_BFnrm3952_MOESM28_ESM.pdf [file 41580_2015_BFnrm3952_MOESM28_ESM.pdf]

Supplementary Table 1. Structures of Pol II initiation factors

| Structure type | Subunit/ Complex                                                                  | Year | Organism                         | Method | PDB/ePDB code | Resolution | Reference |
|----------------|-----------------------------------------------------------------------------------|------|----------------------------------|--------|---------------|------------|-----------|
| TFIIA          | TFIIA - TBP - DNA complex                                                         | 1996 | <i>S. cerevisiae</i>             | X-ray  | 1YTF          | 2.5        | 1         |
| TFIIA          | TFIIA - TBP - DNA complex                                                         | 2003 | <i>S. cerevisiae</i>             | X-ray  | 1NH2          | 1.9        | 2         |
| TFIIA          | TFIIA - TBP - DNA complex                                                         | 2003 | <i>H. sapiens</i>                | X-ray  | 1NVP          | 2.1        | 2         |
| TFIIA          | TFIIA - TBP - DNA complex                                                         | 2005 | <i>S. cerevisiae</i>             | X-ray  | 1RM1          | 2.5        | -         |
| TFIIB          | TFIIB N-terminal zinc ribbon                                                      | 1996 | <i>P. furiosus</i>               | NMR    | 1PFT          | -          | 3         |
| TFIIB          | TFIIB C-terminal core domain                                                      | 1998 | <i>H. sapiens</i>                | NMR    | 1TFB          | -          | 4         |
| TFIIB          | TFIIB N-terminal zinc ribbon                                                      | 2000 | <i>H. sapiens</i>                | NMR    | 1DL6          | -          | 5         |
| TFIIB          | TFIIB N-terminal zinc ribbon, zinc-bound                                          | 2004 | <i>H. sapiens</i>                | NMR    | 1RLY          | -          | 6         |
| TFIIB          | TFIIB N-terminal zinc ribbon, zinc-free                                           | 2004 | <i>H. sapiens</i>                | NMR    | 1RO4          | -          | 6         |
| TFIIB          | TFIIB C-terminal core domain - VP16 activation domain complex                     | 2005 | <i>H. sapiens</i>                | NMR    | 2PHG          | -          | 7         |
| TFIIB          | TFIIB C-terminal domain                                                           | 2009 | <i>T. brucei</i>                 | X-ray  | 3H4C          | 2.3        | 8         |
| TFIIB          | TFIIB core - TBP - DNA complex                                                    | 1996 | <i>H. sapiens/ A. thaliana</i>   | X-ray  | 1VOL          | 2.7        | 9         |
| TFIIB          | TFIIB core - TBP - DNA complex                                                    | 1997 | <i>P. woesei</i>                 | X-ray  | 1AIS          | 2.1        | 10        |
| TFIIB          | TFIIB core - TBP - DNA complex                                                    | 1999 | <i>P. woesei</i>                 | X-ray  | 1D3U          | 2.4        | 11        |
| TFIIB          | TFIIB core - TBP - DNA complex                                                    | 2000 | <i>H. sapiens</i>                | X-ray  | 1C9B          | 2.7        | 12        |
| PolII-TFIIB    | PolII (10 subunit)-TFIIB complex                                                  | 2004 | <i>S. cerevisiae</i>             | X-ray  | 1R5U          | 4.5        | 13        |
| PolII-TFIIB    | PolII (12 subunit)-TFIIB complex                                                  | 2009 | <i>S. cerevisiae</i>             | X-ray  | 3K1F          | 4.3        | 14        |
| PolII-TFIIB    | PolII (10 subunit)-TFIIB complex                                                  | 2009 | <i>S. cerevisiae</i>             | X-ray  | 3K7A          | 3.8        | 15        |
| PolII-TFIIB    | PolII (12 subunit)-TFIIB complex                                                  | 2012 | <i>S. cerevisiae</i>             | X-ray  | 4BBR          | 3.4        | 16        |
| PolII-TFIIB    | PolII (12 subunit)-TFIIB -DNA complex (ITC)                                       | 2012 | <i>S. cerevisiae</i>             | X-ray  | 4BBS          | 3.6        | 16        |
| TFIIF          | A49/ A34.5 (Pol I specific subunits) dimerization module (TFIIF-like)             | 2010 | <i>S. cerevisiae</i>             | X-ray  | 3NFG, 3NFF    | 2.5, 3.2   | 17        |
| TFIIF          | TFIIF alpha/ beta dimerization module                                             | 2000 | <i>H. sapiens</i>                | X-ray  | 1F3U          | 1.7        | 18        |
| TFIIF          | TFIIF alpha C-terminal domain                                                     | 2001 | <i>H. sapiens</i>                | X-ray  | 1I27          | 1.0        | 19        |
| TFIIF          | TFIIF alpha C-terminal domain - FCP1 C-terminal domain complex                    | 2003 | <i>H. sapiens</i>                | NMR    | 1ONV          | -          | 20        |
| TFIIF          | TFIIF alpha C-terminal domain                                                     | 2003 | <i>H. sapiens</i>                | NMR    | 1NHA          | -          | 21        |
| TFIIF          | TFIIF alpha C-terminal domain - FCP1 C-terminal peptide complex                   | 2003 | <i>H. sapiens</i>                | X-ray  | 1J2X          | 2.0        | 22        |
| TFIIF          | TFIIF alpha C-terminal domain - FCP1 Central domain peptide complex               | 2008 | <i>H. sapiens</i>                | NMR    | 2K7L          | -          | 23        |
| TFIIF          | TFIIF beta wHTH domain                                                            | 1998 | <i>H. sapiens</i>                | NMR    | 2BBY          | -          | 24        |
| TFIIE          | TFIIE alpha C-terminal acidic domain                                              | 2007 | <i>H. sapiens</i>                | NMR    | 2JTX          | -          | 25        |
| TFIIE          | TFIIE alpha C-terminal acidic domain                                              | 2008 | <i>H. sapiens</i>                | NMR    | 2RNR          | -          | 26        |
| TFIIE          | TFIIE alpha (TFE) winged helix domain                                             | 2003 | <i>S. solfataricus</i>           | X-ray  | 1Q1H          | 2.9        | 27        |
| TFIIE          | TFIIE alpha zinc finger domain                                                    | 2004 | <i>H. sapiens</i>                | NMR    | 1VD4          | -          | 28        |
| TFIIE          | TFIIE beta central core domain                                                    | 1999 | <i>H. sapiens</i>                | NMR    | 1D8J, 1D8K    | -          | 29        |
| TFIIE          | A49 (Pol I specific subunit) Tandem winged helix domain (predicted in TFIIE beta) | 2010 | <i>S. cerevisiae</i>             | X-ray  | 3NFH, 3NFI    | 2.2, 1.9   | 17        |
| TFIIH          | Cyclin H                                                                          | 1996 | <i>H. sapiens</i>                | X-ray  | 1JKW          | 2.6        | 30        |
| TFIIH          | MAT1 N-terminal domain                                                            | 2001 | <i>H. sapiens</i>                | NMR    | 1G25          | -          | 31        |
| TFIIH          | Subunit 1 PH domain                                                               | 2004 | <i>H. sapiens</i>                | NMR    | 1PFJ          | -          | 32        |
| TFIIH          | CDK7                                                                              | 2004 | <i>H. sapiens</i>                | X-ray  | 1UA2          | 3.0        | 33        |
| TFIIH          | Subunit 1 (Tfb1) PH domain                                                        | 2005 | <i>S. cerevisiae</i>             | NMR    | 1Y5O          | -          | 34        |
| TFIIH          | Subunit 5                                                                         | 2005 | <i>H. sapiens</i>                | X-ray  | 1YDL          | 2.3        | -         |
| TFIIH          | Subunit 2 C-terminal domain                                                       | 2005 | <i>H. sapiens</i>                | NMR    | 1Z6O          | -          | 35        |
| TFIIH          | Subunit 1 BSD domain                                                              | 2006 | <i>H. sapiens</i>                | NMR    | 2DII          | -          | -         |
| TFIIH          | Subunit 1 (Tfb1) PH domain in complex with the p53 activation domain              | 2006 | <i>S. cerevisiae/ H. sapiens</i> | NMR    | 2GS0          | -          | 36        |
| TFIIH          | Subunit 5                                                                         | 2007 | <i>H. sapiens</i>                | NMR    | 2JNJ          | -          | 37        |
| TFIIH          | Subunit 5 (Tfb5) with the Subunit 4 (Tfb2) C-terminus                             | 2008 | <i>S. cerevisiae</i>             | X-ray  | 3DOM, 3DGP    | 2.6, 1.8   | 38        |
| TFIIH          | Subunit 1 (Tfb1) PH domain in complex with the VP16 activation domain             | 2008 | <i>S. cerevisiae</i>             | NMR    | 2K2U          | -          | 39        |
| TFIIH          | XPD helicase                                                                      | 2008 | <i>T. acidophilum</i>            | X-ray  | 2VSF          | 2.9        | 40        |
| TFIIH          | Subunit 1 (Tfb1) PH domain in complex with the EKLf activation domain             | 2011 | <i>S. cerevisiae</i>             | NMR    | 2L2I          | -          | -         |
| TFIIH          | Subunit 1 (Tfb1) PH domain in complex with Rad2                                   | 2012 | <i>S. cerevisiae</i>             | NMR    | 2LOX          | -          | 41        |
| TFIIH          | Subunit 1 (Tfb1) PH domain in complex with Rad4                                   | 2013 | <i>S. cerevisiae</i>             | NMR    | 2M14          | -          | 42        |
| TFIIH          | XPB helicase C-terminal domain                                                    | 2013 | <i>H. sapiens</i>                | X-ray  | 4ERN          | 1.8        | 43        |

|                     |                                                                                                 |      |                                               |         |                              |            |    |
|---------------------|-------------------------------------------------------------------------------------------------|------|-----------------------------------------------|---------|------------------------------|------------|----|
| TFIIH               | Subunit 1 (Tfb1) PH domain in complex with EBNA2 activation domain                              | 2014 | <i>S. cerevisiae</i>                          | NMR     | 2MKR                         | -          | 44 |
| TFIIH               | apo TFIIH                                                                                       | 2013 | <i>H. sapiens</i>                             | EM      | EMD-2309                     | 20         | 45 |
| TFIIE-TFIIH complex | TFIIE alpha C-terminal acidic domain - PHD domain p62 (TFIIH) complex                           | 2008 | <i>H. sapiens</i>                             | NMR     | 2RNQ                         | -          | 26 |
| TFIID               | TAF6/TAF9 histone fold domains                                                                  | 1996 | <i>D. melanogaster</i>                        | X-ray   | 1TAF                         | 2.0        | 46 |
| TFIID               | TAF11/TAF13 histone fold domains                                                                | 1998 | <i>H. sapiens</i>                             | X-ray   | 1BH8, 1BH9                   | 3.0, 2.6   | 47 |
| TFIID               | TBP in complex with the TAF1 N-terminus                                                         | 1998 | <i>S. cerevisiae</i> / <i>D. melanogaster</i> | NMR     | 1TBA                         | -          | 48 |
| TFIID               | TAF1 double bromodomain module                                                                  | 2000 | <i>H. sapiens</i>                             | X-ray   | 1EQF                         | 2.1        | 49 |
| TFIID               | TAF4/TAF12 histone fold domains                                                                 | 2002 | <i>H. sapiens</i>                             | X-ray   | 1H3O                         | 2.3        | 50 |
| TFIID               | TAF5 NTD2 domain                                                                                | 2007 | <i>H. sapiens</i>                             | X-ray   | 2NXP                         | 2.2        | 51 |
| TFIID               | TAF5 N-terminal domain                                                                          | 2007 | <i>S. cerevisiae</i>                          | X-ray   | 2J49                         | 2.3        | 52 |
| TFIID               | TAF5 N-terminal domain                                                                          | 2007 | <i>E. cuniculi</i>                            | X-ray   | 2J4B                         | 2.5        | 52 |
| TFIID               | TAF4 TAFH domain                                                                                | 2007 | <i>H. sapiens</i>                             | X-ray   | 2P6V                         | 2.0        | 53 |
| TFIID               | TAF3 PHD domain (alone, in complex with a H3K4me3 peptide)                                      | 2008 | <i>M. musculus</i>                            | NMR     | 2K16, 2K17                   | -          | 54 |
| TFIID               | TAF1 double bromodomain in complex with a histone chaperone                                     | 2010 | <i>H. sapiens</i>                             | X-ray   | 3AAD                         | 3.3        | 55 |
| TFIID               | TAF14 YEATS domain                                                                              | 2011 | <i>S. cerevisiae</i>                          | NMR     | 2L7E                         | -          | 56 |
| TFIID               | TAF1L bromodomain 2                                                                             | 2009 | <i>H. sapiens</i>                             | X-ray   | 3HMH                         | 2.1        | 57 |
| TFIID               | TAF1 bromodomain 2                                                                              | 2012 | <i>H. sapiens</i>                             | X-ray   | 3UV4                         | 1.9        | 57 |
| TFIID               | TAF1 tandem bromodomains                                                                        | 2012 | <i>H. sapiens</i>                             | X-ray   | 3UV5                         | 2.0        | 57 |
| TFIID               | TAF14 YEATS domain                                                                              | 2012 | <i>S. cerevisiae</i>                          | X-ray   | 3QRL                         | 1.7        | -  |
| TFIID               | TAF6 C-terminal domain                                                                          | 2012 | <i>A. locustae</i>                            | X-ray   | 4ATG                         | 1.9        | 58 |
| TFIID               | TBP/TAF1 N-terminal domains TAND1 and TAND2                                                     | 2013 | <i>S. cerevisiae</i>                          | X-ray   | 4B0A                         | 1.97       | 59 |
| TFIID               | TAF1/TAF7 interaction domains                                                                   | 2014 | <i>S. cerevisiae</i>                          | X-ray   | 4OY2                         | 2.9        | 60 |
| TFIID               | Holo-TFIID                                                                                      | 2007 | <i>H. sapiens</i>                             | Cryo-EM | EMD-1194, EMD-1195, EMD-1196 | 33, 32, 35 | 61 |
| TFIID               | Holo-TFIID                                                                                      | 2008 | <i>S. cerevisiae</i>                          | Cryo-EM | EMD-5026                     | 22         | 62 |
| TFIID               | TFIID (lacking, containing TBP)                                                                 | 2009 | <i>S. pombe</i>                               | Cryo-EM | EMD-5135, EMD-5134           | 10, 8      | 63 |
| TFIID               | Holo-TFIID                                                                                      | 2010 | <i>S. cerevisiae</i>                          | Cryo-EM | EMD-5175                     | 28.9       | 64 |
| TFIID               | TFIID-Rap1-DNA complex                                                                          | 2010 | <i>S. cerevisiae</i>                          | Cryo-EM | EMD-5176                     | 24.5       | 64 |
| TFIID               | TFIID-TFIIA-DNA complex (lacking, containing Rap1)                                              | 2010 | <i>S. cerevisiae</i>                          | Cryo-EM | EMD-5178, EMD-5177           | 31.4, 18.6 | 64 |
| TFIID               | Recombinantly expressed TAF5/TAF6/TAF9 complex                                                  | 2013 | <i>H. sapiens</i>                             | Cryo-EM | EMD-2229                     | 12.8       | 65 |
| TFIID               | Recombinantly expressed TFIID core (TAF4/TAF5/TAF6/TAF9/TAF12)                                  | 2013 | <i>H. sapiens</i>                             | Cryo-EM | EMD-2230                     | 11.6       | 65 |
| TFIID               | Recombinantly expressed TAF4/TAF5/TAF6/TAF8/TAF9/TAF10/TAF12 complex                            | 2013 | <i>H. sapiens</i>                             | Cryo-EM | EMD-2231                     | 14.3       | 65 |
| TFIID               | Holo-TFIID (canonical, rearranged conformations)                                                | 2013 | <i>H. sapiens</i>                             | Cryo-EM | EMD-2287, EMD-2284           | 35, 35     | 66 |
| TFIID               | TFIID-TFIIA-super core promoter DNA (canonical conformation/no DNA density)                     | 2013 | <i>H. sapiens</i>                             | Cryo-EM | EMD-2283                     | 32         | 66 |
| TFIID               | TFIID-TFIIA-super core promoter DNA (rearranged conformation/DNA density)                       | 2013 | <i>H. sapiens</i>                             | Cryo-EM | EMD-2282                     | 32         | 66 |
| Pol II complex      | Complex of VP16, Mediator, RNA polymerase II, and TFIIF                                         | 2011 | <i>H. sapiens</i>                             | Cryo-EM | EMD-5343                     | 36         | 67 |
| Pol II complex      | Complex of Mediator, RNA polymerase II, and TFIIF                                               | 2012 | <i>H. sapiens</i>                             | Cryo-EM | EMD-5344                     | 32         | 68 |
| Pol II complex      | Complex of RNA polymerase II, Mediator head module, TFIIF, TFIIIB, TBP, and promoter DNA        | 2012 | <i>S. cerevisiae</i>                          | Cryo-EM | EMD-5407                     | 16         | 69 |
| Pol II complex      | Complex of TBP, TFIIA, TFIIIB, DNA, and RNA polymerase II (closed)                              | 2013 | <i>H. sapiens</i>                             | Cryo-EM | EMD-2304                     | 12.0       | 45 |
| Pol II complex      | Complex of TBP, TFIIA, TFIIIB, DNA, RNA polymerase II, and TFIIF (closed)                       | 2013 | <i>H. sapiens</i>                             | Cryo-EM | EMD-2305                     | 12.4       | 45 |
| Pol II complex      | Complex of TBP, TFIIA, TFIIIB, DNA, RNA polymerase II, TFIIF, and TFIIE (closed)                | 2013 | <i>H. sapiens</i>                             | Cryo-EM | EMD-2306                     | 11.0       | 45 |
| Pol II complex      | Complex of TBP, TFIIA, TFIIIB, DNA, RNA polymerase II, TFIIF, and TFIIE (open)                  | 2013 | <i>H. sapiens</i>                             | Cryo-EM | EMD-2307                     | 12.7       | 45 |
| Pol II complex      | Complex of TBP, TFIIA, TFIIIB, DNA, RNA polymerase II, TFIIF, TFIIE, and TFIIH (closed)         | 2013 | <i>H. sapiens</i>                             | EM      | EMD-2308                     | 14.0       | 45 |
| Pol II complex      | Complex of RNA polymerase II, TFIIIS, promoter DNA, TFIIA, TFIIIB, TBP, TFIIE, TFIIF, and TFIIH | 2013 | <i>S. cerevisiae</i>                          | Cryo-EM | EMD-2394                     | 16         | 70 |

1. Tan, S., Hunziker, Y., Sargent, D.F. & Richmond, T.J. Crystal structure of a yeast TFIIA/TBP/DNA complex. *Nature* **381**, 127-51 (1996).
2. Bleichenbacher, M., Tan, S. & Richmond, T.J. Novel interactions between the components of human and yeast TFIIA/TBP/DNA complexes. *Journal of molecular biology* **332**, 783-93 (2003).
3. Zhu, W. et al. The N-terminal domain of TFIIB from *Pyrococcus furiosus* forms a zinc ribbon. *Nat Struct Biol* **3**, 122-4 (1996).
4. Hayashi, F. et al. Human general transcription factor TFIIB: conformational variability and interaction with VP16 activation domain. *Biochemistry* **37**, 7941-51 (1998).
5. Chen, H.T., Legault, P., Glushka, J., Omichinski, J.G. & Scott, R.A. Structure of a (Cys3His) zinc ribbon, a ubiquitous motif in archaeal and eucaryal transcription. *Protein science : a publication of the Protein Society* **9**, 1743-52 (2000).
6. Ghosh, M. et al. Probing Zn<sup>2+</sup>-binding effects on the zinc-ribbon domain of human general transcription factor TFIIB. *Biochem J* **378**, 317-24 (2004).
7. Jonker, H.R., Wechselberger, R.W., Boelens, R., Folkers, G.E. & Kaptein, R. Structural properties of the promiscuous VP16 activation domain. *Biochemistry* **44**, 827-39 (2005).
8. Ibrahim, B.S. et al. Structure of the C-terminal domain of transcription factor IIB from *Trypanosoma brucei*. *Proc Natl Acad Sci U S A* **106**, 13242-7 (2009).
9. Nikolov, D.B. et al. Crystal structure of a TFIIB-TBP-TATA-element ternary complex. *Nature* **377**, 119-28 (1995).
10. Kosa, P.F., Ghosh, G., DeDecker, B.S. & Sigler, P.B. The 2.1-Å crystal structure of an archaeal preinitiation complex: TATA-box-binding protein/transcription factor (II)B core/TATA-box. *Proceedings of the National Academy of Sciences of the United States of America* **94**, 6042-7 (1997).
11. Littlefield, O., Korkhin, Y. & Sigler, P.B. The structural basis for the oriented assembly of a TBP/TFB/promoter complex. *Proceedings of the National Academy of Sciences of the United States of America* **96**, 13668-73 (1999).
12. Tsai, F.T. & Sigler, P.B. Structural basis of preinitiation complex assembly on human pol II promoters. *The EMBO journal* **19**, 25-36 (2000).
13. Bushnell, D.A., Westover, K.D., Davis, R.E. & Kornberg, R.D. Structural basis of transcription: an RNA polymerase II-TFIIB cocystal at 4.5 Å. *Science* **303**, 983-8 (2004).
14. Kostrewa, D. et al. RNA polymerase II-TFIIB structure and mechanism of transcription initiation. *Nature* **462**, 323-30 (2009).
15. Liu, X., Bushnell, D.A., Wang, D., Calero, G. & Kornberg, R.D. Structure of an RNA polymerase II-TFIIB complex and the transcription initiation mechanism. *Science* **327**, 206-9 (2010).
16. Sainsbury, S., Niesser, J. & Cramer, P. Structure and function of the initially transcribing RNA polymerase II-TFIIB complex. *Nature* **493**, 437-40 (2013).
17. Geiger, S.R. et al. RNA polymerase I contains a TFIIF-related DNA-binding subcomplex. *Molecular cell* **39**, 583-94 (2010).
18. Gaiser, F., Tan, S. & Richmond, T.J. Novel dimerization fold of RAP30/RAP74 in human TFIIF at 1.7 Å resolution. *Journal of molecular biology* **302**, 1119-27 (2000).
19. Kamada, K., De Angelis, J., Roeder, R.G. & Burley, S.K. Crystal structure of the C-terminal domain of the RAP74 subunit of human transcription factor IIF. *Proceedings of the National Academy of Sciences of the United States of America* **98**, 3115-20 (2001).
20. Nguyen, B.D. et al. NMR structure of a complex containing the TFIIF subunit RAP74 and the RNA polymerase II carboxyl-terminal domain phosphatase FCP1. *Proceedings of the National Academy of Sciences of the United States of America* **100**, 5688-93 (2003).

21. Nguyen, B.D. *et al.* Solution structure of the carboxyl-terminal domain of RAP74 and NMR characterization of the FCP1-binding sites of RAP74 and human TFIIB. *Biochemistry* **42**, 1460-9 (2003).
22. Kamada, K., Roeder, R.G. & Burley, S.K. Molecular mechanism of recruitment of TFIIF-associating RNA polymerase C-terminal domain phosphatase (FCP1) by transcription factor IIF. *Proceedings of the National Academy of Sciences of the United States of America* **100**, 2296-9 (2003).
23. Yang, A. *et al.* NMR structure of a complex formed by the carboxyl-terminal domain of human RAP74 and a phosphorylated peptide from the central domain of the FCP1 phosphatase. *Biochemistry* **48**, 1964-74 (2009).
24. Groft, C.M., Uljon, S.N., Wang, R. & Werner, M.H. Structural homology between the Rap30 DNA-binding domain and linker histone H5: implications for preinitiation complex assembly. *Proceedings of the National Academy of Sciences of the United States of America* **95**, 9117-22 (1998).
25. Di Lello, P. *et al.* p53 and TFIIEalpha share a common binding site on the Tfb1/p62 subunit of TFIIF. *Proceedings of the National Academy of Sciences of the United States of America* **105**, 106-11 (2008).
26. Okuda, M. *et al.* Structural insight into the TFIIE-TFIIF interaction: TFIIE and p53 share the binding region on TFIIF. *The EMBO journal* **27**, 1161-71 (2008).
27. Meinhart, A., Blobel, J. & Cramer, P. An extended winged helix domain in general transcription factor E/IIE alpha. *The Journal of biological chemistry* **278**, 48267-74 (2003).
28. Okuda, M. *et al.* A novel zinc finger structure in the large subunit of human general transcription factor TFIIE. *The Journal of biological chemistry* **279**, 51395-403 (2004).
29. Okuda, M. *et al.* Structure of the central core domain of TFIIEbeta with a novel double-stranded DNA-binding surface. *The EMBO journal* **19**, 1346-56 (2000).
30. Andersen, G., Poterszman, A., Egly, J.M., Moras, D. & Thierry, J.C. The crystal structure of human cyclin H. *FEBS Lett* **397**, 65-9 (1996).
31. Gervais, V. *et al.* Solution structure of the N-terminal domain of the human TFIIF MAT1 subunit: new insights into the RING finger family. *J Biol Chem* **276**, 7457-64 (2001).
32. Gervais, V. *et al.* TFIIF contains a PH domain involved in DNA nucleotide excision repair. *Nat Struct Mol Biol* **11**, 616-22 (2004).
33. Lolli, G., Lowe, E.D., Brown, N.R. & Johnson, L.N. The crystal structure of human CDK7 and its protein recognition properties. *Structure* **12**, 2067-79 (2004).
34. Di Lello, P. *et al.* NMR structure of the amino-terminal domain from the Tfb1 subunit of TFIIF and characterization of its phosphoinositide and VP16 binding sites. *Biochemistry* **44**, 7678-86 (2005).
35. Kellenberger, E. *et al.* Solution structure of the C-terminal domain of TFIIF P44 subunit reveals a novel type of C4C4 ring domain involved in protein-protein interactions. *J Biol Chem* **280**, 20785-92 (2005).
36. Di Lello, P. *et al.* Structure of the Tfb1/p53 complex: Insights into the interaction between the p62/Tfb1 subunit of TFIIF and the activation domain of p53. *Mol Cell* **22**, 731-40 (2006).
37. Vitorino, M. *et al.* Solution structure and self-association properties of the p8 TFIIF subunit responsible for trichothiodystrophy. *J Mol Biol* **368**, 473-80 (2007).
38. Kainov, D.E., Vitorino, M., Cavarelli, J., Poterszman, A. & Egly, J.M. Structural basis for group A trichothiodystrophy. *Nat Struct Mol Biol* **15**, 980-4 (2008).
39. Langlois, C. *et al.* NMR structure of the complex between the Tfb1 subunit of TFIIF and the activation domain of VP16: structural similarities between VP16 and p53. *J Am Chem Soc* **130**, 10596-604 (2008).

40. Wolski, S.C. et al. Crystal structure of the FeS cluster-containing nucleotide excision repair helicase XPD. *PLoS Biol* **6**, e149 (2008).
41. Lafrance-Vanasse, J. et al. Structural and functional characterization of interactions involving the Tfb1 subunit of TFIIH and the NER factor Rad2. *Nucleic Acids Res* **40**, 5739-50 (2012).
42. Lafrance-Vanasse, J., Arseneault, G., Cappadocia, L., Legault, P. & Omichinski, J.G. Structural and functional evidence that Rad4 competes with Rad2 for binding to the Tfb1 subunit of TFIIH in NER. *Nucleic Acids Res* **41**, 2736-45 (2013).
43. Hilario, E., Li, Y., Nobumori, Y., Liu, X. & Fan, L. Structure of the C-terminal half of human XPB helicase and the impact of the disease-causing mutation XP11BE. *Acta Crystallogr D Biol Crystallogr* **69**, 237-46 (2013).
44. Chabot, P.R. et al. Structural and functional characterization of a complex between the acidic transactivation domain of EBNA2 and the Tfb1/p62 subunit of TFIIH. *PLoS Pathog* **10**, e1004042 (2014).
45. He, Y., Fang, J., Taatjes, D.J. & Nogales, E. Structural visualization of key steps in human transcription initiation. *Nature* **495**, 481-6 (2013).
46. Xie, X. et al. Structural similarity between TAFs and the heterotetrameric core of the histone octamer. *Nature* **380**, 316-22 (1996).
47. Birck, C. et al. Human TAF(II)28 and TAF(II)18 interact through a histone fold encoded by atypical evolutionary conserved motifs also found in the SPT3 family. *Cell* **94**, 239-49 (1998).
48. Liu, D. et al. Solution structure of a TBP-TAF(II)230 complex: protein mimicry of the minor groove surface of the TATA box unwound by TBP. *Cell* **94**, 573-83 (1998).
49. Jacobson, R.H., Ladurner, A.G., King, D.S. & Tjian, R. Structure and function of a human TAFII250 double bromodomain module. *Science* **288**, 1422-5 (2000).
50. Werten, S. et al. Crystal structure of a subcomplex of human transcription factor TFIID formed by TATA binding protein-associated factors hTAF4 (hTAF(II)135) and hTAF12 (hTAF(II)20). *The Journal of biological chemistry* **277**, 45502-9 (2002).
51. Bhattacharya, S., Takada, S. & Jacobson, R.H. Structural analysis and dimerization potential of the human TAF5 subunit of TFIID. *Proc Natl Acad Sci U S A* **104**, 1189-94 (2007).
52. Romier, C. et al. Crystal structure, biochemical and genetic characterization of yeast and E. cuniculi TAF(II)5 N-terminal domain: implications for TFIID assembly. *J Mol Biol* **368**, 1292-306 (2007).
53. Wang, X. et al. Conserved region I of human coactivator TAF4 binds to a short hydrophobic motif present in transcriptional regulators. *Proc Natl Acad Sci U S A* **104**, 7839-44 (2007).
54. van Ingen, H. et al. Structural insight into the recognition of the H3K4me3 mark by the TFIID subunit TAF3. *Structure* **16**, 1245-56 (2008).
55. Akai, Y. et al. Structure of the histone chaperone CIA/ASF1-double bromodomain complex linking histone modifications and site-specific histone eviction. *Proc Natl Acad Sci U S A* **107**, 8153-8 (2010).
56. Zhang, W., Zhang, J., Zhang, X., Xu, C. & Tu, X. Solution structure of the Taf14 YEATS domain and its roles in cell growth of *Saccharomyces cerevisiae*. *Biochem J* **436**, 83-90 (2011).
57. Filippakopoulos, P. et al. Histone recognition and large-scale structural analysis of the human bromodomain family. *Cell* **149**, 214-31 (2012).
58. Scheer, E., Delbac, F., Tora, L., Moras, D. & Romier, C. TFIID TAF6-TAF9 complex formation involves the HEAT repeat-containing C-terminal domain of TAF6 and is modulated by TAF5 protein. *J Biol Chem* **287**, 27580-92 (2012).
59. Anandapadamanaban, M. et al. High-resolution structure of TBP with TAF1 reveals anchoring patterns in transcriptional regulation. *Nature structural & molecular biology* **20**, 1008-14 (2013).

60. Bhattacharya, S. et al. Structural and functional insight into TAF1-TAF7, a subcomplex of transcription factor II D. *Proc Natl Acad Sci U S A* **111**, 9103-8 (2014).
61. Grob, P. et al. Cryo-electron microscopy studies of human TFIID: conformational breathing in the integration of gene regulatory cues. *Structure* **14**, 511-20 (2006).
62. Papai, G. et al. Mapping the initiator binding Taf2 subunit in the structure of hydrated yeast TFIID. *Structure* **17**, 363-73 (2009).
63. Elmlund, H. et al. Cryo-EM reveals promoter DNA binding and conformational flexibility of the general transcription factor TFIID. *Structure* **17**, 1442-52 (2009).
64. Papai, G. et al. TFIIA and the transactivator Rap1 cooperate to commit TFIID for transcription initiation. *Nature* **465**, 956-60 (2010).
65. Bieniossek, C. et al. The architecture of human general transcription factor TFIID core complex. *Nature* **493**, 699-702 (2013).
66. Cianfrocco, M.A. et al. Human TFIID binds to core promoter DNA in a reorganized structural state. *Cell* **152**, 120-31 (2013).
67. Bernecky, C., Grob, P., Ebmeier, C.C., Nogales, E. & Taatjes, D.J. Molecular architecture of the human Mediator-RNA polymerase II-TFIIF assembly. *PLoS biology* **9**, e1000603 (2011).
68. Bernecky, C. & Taatjes, D.J. Activator-mediator binding stabilizes RNA polymerase II orientation within the human mediator-RNA polymerase II-TFIIF assembly. *J Mol Biol* **417**, 387-94 (2012).
69. Cai, G. et al. Interaction of the mediator head module with RNA polymerase II. *Structure* **20**, 899-910 (2012).
70. Murakami, K. et al. Architecture of an RNA polymerase II transcription pre-initiation complex. *Science* **342**, 1238724 (2013).
